# Supplementary material for: Linneg Sca-1high CD49fhigh prostate cancer cells derived from the Hi-Myc mouse model are tumor-initiating cells with basal-epithelial characteristics and differentiation potential in vitro and in vivo
Source: PubMed Central journal article supplement (PMC5041897; doi:10.18632/oncotarget.7535), 2016-02-20
Supplement: oncotarget-07-25194-s001.pdf [file oncotarget-07-25194-s001.pdf]

## Lin<sup>neg</sup> Sca-1<sup>high</sup>CD49f<sup>high</sup> prostate cancer cells derived from the Hi-Myc mouse model are tumor-initiating cells with basal-epithelial characteristics and differentiation potential *in vitro* and *in vivo*

### Supplementary Materials

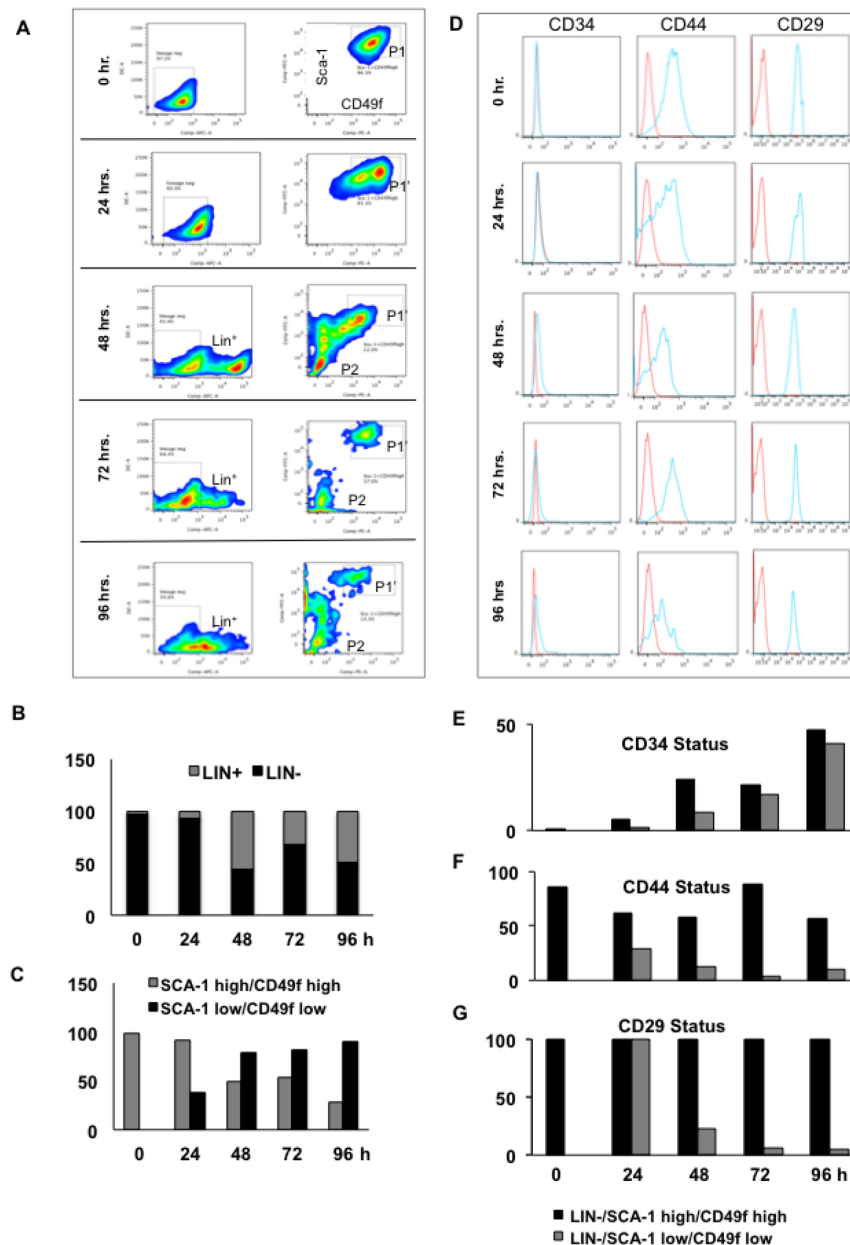

**Supplementary Figure S1: Analysis of spheroid cell populations over time.** HMVP-2 cells were seeded for spheroid formation and were stained by FC at 0, 24, 48, 72 and 96 hrs. (A) At the time of seeding, a single homogenous cell type expressing only Lin<sup>neg</sup> Sca-1<sup>high</sup> CD49f<sup>high</sup> markers was detected (A) 0 hr. On the following subsequent days, cells collected from the spheroids showed a gradual differentiation to at least three cell subpopulations, Lin<sup>pos</sup> cells, Lin<sup>neg</sup> Sca-1<sup>high</sup> CD49f<sup>high</sup> cells and Lin<sup>neg</sup> Sca-1<sup>low</sup> CD49f<sup>low</sup> cells (A 24 to 96 hrs, B and C). (D) FC analyses for CD34, CD44 and CD29 expression gated on Lin<sup>neg</sup> Sca-1<sup>high</sup> CD49f<sup>high</sup> and Lin<sup>neg</sup> Sca-1<sup>low</sup> CD49f<sup>low</sup> populations.

In this experiment, CD34 was absent in both the Lin<sup>neg</sup> Sca-1<sup>high</sup> CD49f<sup>high</sup> cells at 0 hr, and in the differentiated Lin<sup>neg</sup> Sca-1<sup>low</sup> CD49f<sup>low</sup> cells a day later, although expression gradually started to increase in both cell sub-populations up to almost 40–50% after 96 hrs in culture (D left column and E). CD44 was initially expressed in a large part of the original HMVP-2 Lin<sup>neg</sup>Sca-1<sup>high</sup> CD49f<sup>high</sup> cells (about 90%) and the expression was lower on the Lin<sup>neg</sup> Sca-1<sup>low</sup> CD49f<sup>low</sup> sub-population after one day of culture (~30%). CD44 expression was gradually decreased in both cell populations to ~60% at 96 hrs in the cells expressing Lin<sup>neg</sup> Sca-1<sup>high</sup> CD49f<sup>high</sup> suggesting a loss of pluripotentiality. CD44 expression was almost completely lost in the Lin<sup>neg</sup> Sca-1<sup>low</sup> CD49f<sup>low</sup> expressing cells, implying further cell differentiation (D middle column and F). CD29 was expressed throughout the four day assay period and was decreased in the Lin<sup>neg</sup> Sca-1<sup>low</sup> CD49f<sup>low</sup> cells showing signs of further differentiation (D right column and G).

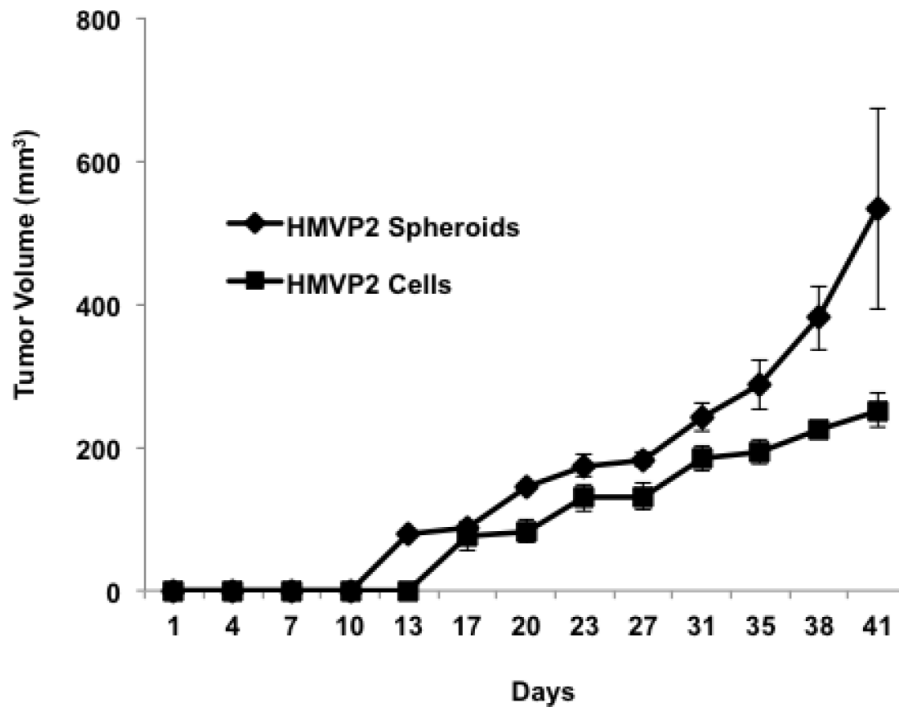

**Supplementary Figure S2: Comparison of HMVP2 cells and HMVP2 spheroids for tumor growth in male FVB/N mice.** Values represent mean ± SEM from tumors in 4 mice per group.

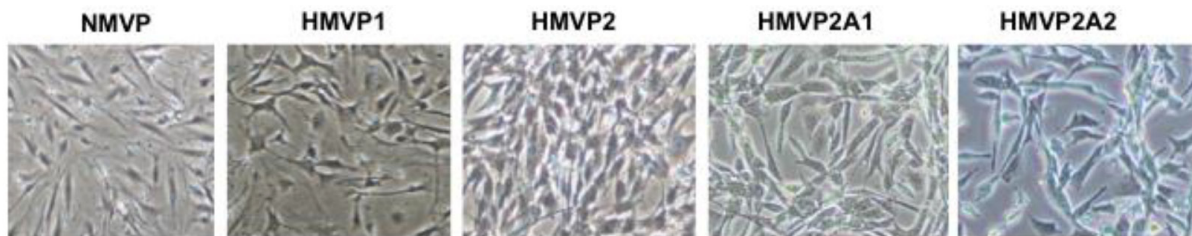

**Supplementary Figure S3: Representative morphology of all established cell lines.**

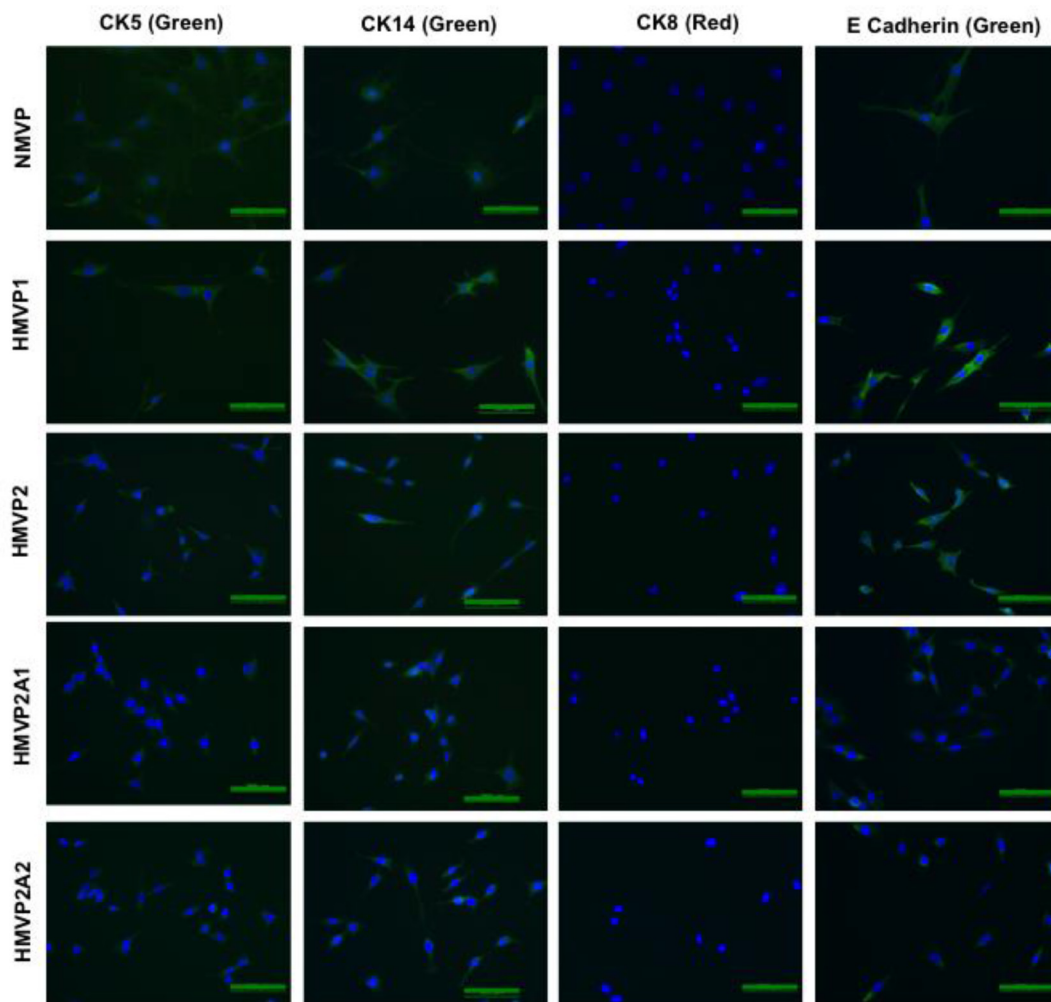

**Supplementary Figure S4: ICC staining of NMVP, HMVP1, HMVP2, HMVP2A1 and HMVP2A2 cells for epithelial cell markers.** Cells were allowed to grow in tissue culture inserts for 24 h and then stained for CK5, CK14, CK8 and E-cadherin (left to right). (The length of bar is 200  $\mu$ m).

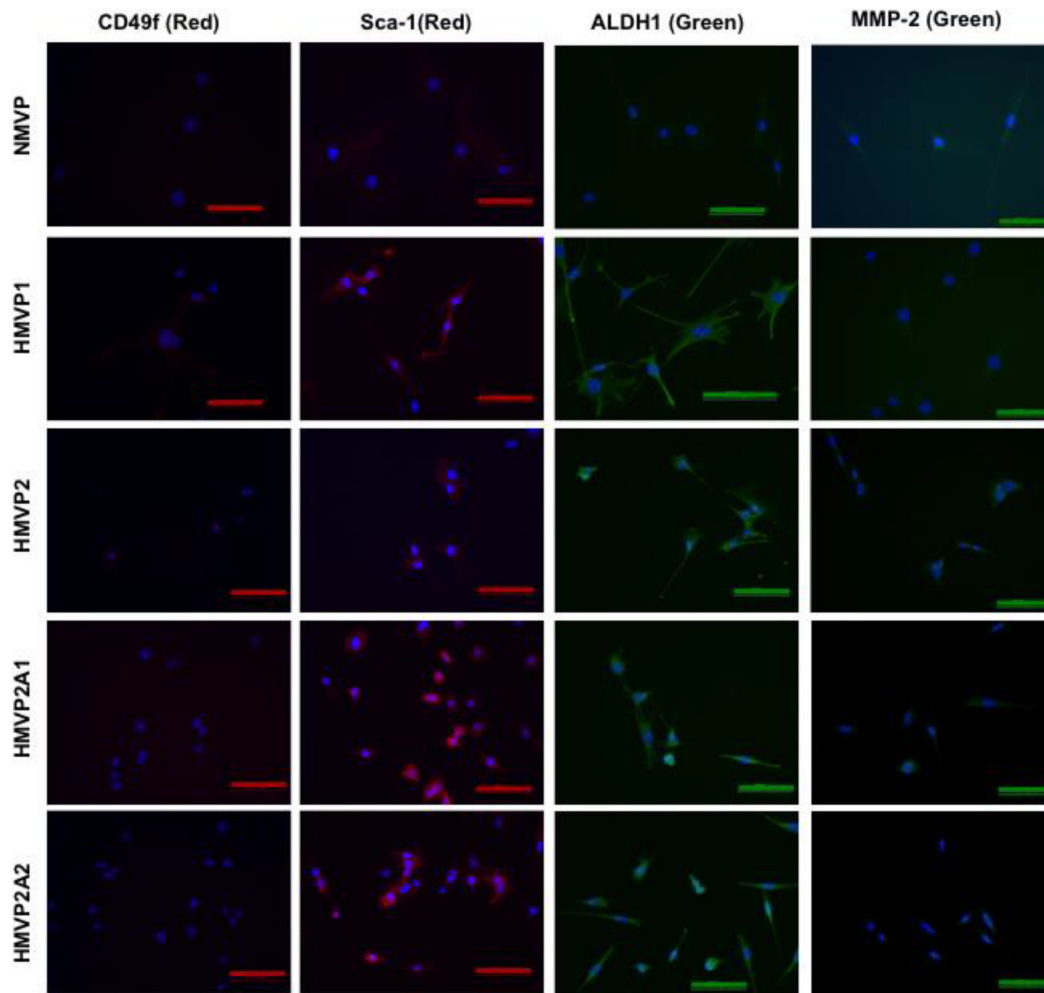

**Supplementary Figure S5: ICC staining of NMVP, HMVP1, HMVP2, HMVP2A1 and HMVP2A2 cells for stem cell markers and MMP-2.** Cells were allowed to grow in tissue culture inserts for 24 h and then stained for CD49f, Sca-1, ALDH1 and MMP-2 (left to right). (The length of bar is 200  $\mu$ m).

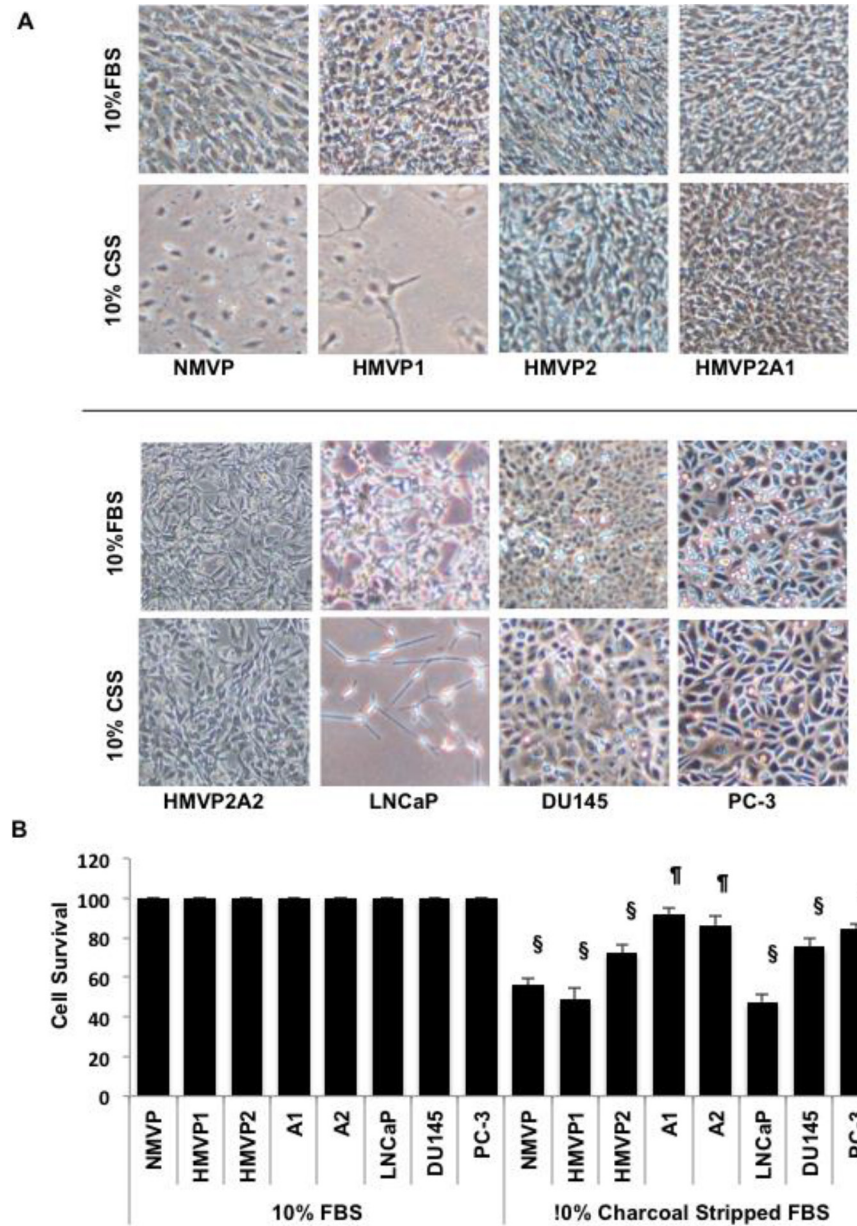

**Supplementary Figure S6: Effect of charcoal stripped serum on the growth/survival of isolated mouse prostate (normal and tumor) cells and human PCa cells.** Cells were plated in tissue culture dishes and the next day media was replaced with either 10% FBS or 10% charcoal stripped serum for 72 h. **(A)** Appearance of cells. Magnification is 20 $\times$ . **(B)** cell growth/survival was measured by MTT assay. Significantly different ( $^*P < 0.01$ ,  $^{\$}P < 0.001$ ) from the respective control groups (10% FBS) as analyzed by Student's *t* test.

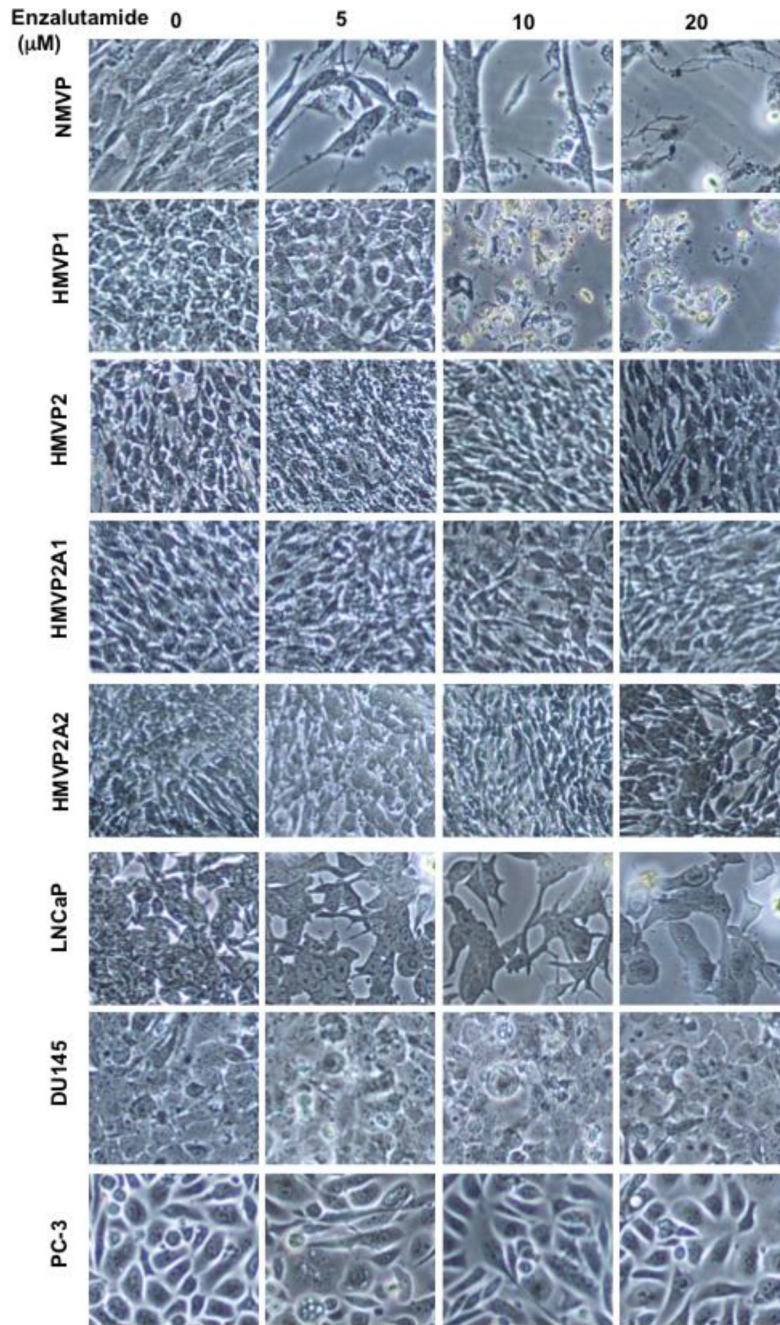

**Supplementary Figure S7: Effect of enzalutamide (ENZ) on the growth/survival of isolated mouse prostate (normal and tumor) cells and human PCa cells.** Cells were plated in tissue culture plates and treated with the indicated concentration of ENZ for 72 h. Magnification is 40 $\times$ .
